# Supplementary material
Source: Research Square preprint supplement (doi:10.21203/rs.3.rs-14425/v3)
Supplement: Supplementary file 2 [file fdada072cd24faea2238592e.xlsx]

## Sheet: Sheet1
Table1:The summary of data from RNA-seq for Tibetan (TP) and Yorkshire (LW) pigs.
Sample	Breed	Accession Number	Clean Reads	Mapping Ratio(%)
TP_1	Tibetan pig	SRR5651381	40363474	94.69
TP_2	Tibetan pig	SRR5651382	49561190	94.09
TP_3	Tibetan pig	SRR5651383	41090604	94.77
LW_1	Yorkshire pig	SRR5651387	38321268	95.07
LW_2	Yorkshire pig	SRR5651388	44401474	95.25
LW_3	Yorkshire pig	SRR5651389	44689528	95.08
